# Supplementary material for: Test-Retest Stability of Cerebral 2-Deoxy-2-[18F]Fluoro-D-Glucose ([18F]FDG) Positron Emission Tomography (PET) in Male and Female Rats
Source: Springer Nature journal article supplement (doi:10.1007/s11307-018-1245-4), 2018-07-09
Supplement: MOESM1 [file 15927502]

## Electronic Supplementary Material

### Test-Retest Stability of Cerebral 2'-Deoxy-2-[<sup>18</sup>F]Fluoro-D-gGlucose ([<sup>18</sup>F]FDG)

### Positron Emission Tomography (PET) in Male and Female Rats

### Journal: Molecular Imaging and Biology

Jürgen W.A. Sijbesma, Aren van Waarde\*, David Vázquez García, Hendrikus H. Boersma, Riemer H.J.A. Slart, Rudi A.J.O. Dierckx, Janine Doorduyn

University of Groningen, University Medical Center Groningen, Department of Nuclear Medicine and Molecular Imaging, Hanzeplein 1, 9713GZ Groningen, The Netherlands

First author: Ing. J.W.A.Sijbesma, University of Groningen, University Medical Center Groningen, Department of Nuclear Medicine and Molecular Imaging, Hanzeplein 1, 9713GZ Groningen, The Netherlands. E-mail: [j.w.a.sijbesma@umcg.nl](mailto:j.w.a.sijbesma@umcg.nl). Telephone: +31-50-3613183. Telefax: +31-50-3611687.

\* Corresponding author: Dr. A.van Waarde, University of Groningen, University Medical Center Groningen, Department of Nuclear Medicine and Molecular Imaging, Hanzeplein 1, 9713GZ Groningen, The Netherlands. E-mail: [a.van.waarde@umcg.nl](mailto:a.van.waarde@umcg.nl). Telephone: +31-50-3613215. Telefax: +31-50-3611687.

### Supplementary Table 1: rCMR<sub>glucose</sub>

| Region        | MALE Test |      | MALE Retest        |      | FEMALE Test |      | FEMALE Retest      |      | % relative difference |        | TRV   |        | COV Test |       | COV Retest |        | ICC  |        |
|---------------|-----------|------|--------------------|------|-------------|------|--------------------|------|-----------------------|--------|-------|--------|----------|-------|------------|--------|------|--------|
|               | Mean      | SD   | Mean               | SD   | Mean        | SD   | Mean               | SD   | MALE                  | FEMALE | MALE  | FEMALE | MALE     | MALE  | FEMALE     | FEMALE | MALE | FEMALE |
| Entire brain  | 20.91     | 7.20 | 17.33 <sup>§</sup> | 4.27 | 20.75       | 4.06 | 15.94 <sup>§</sup> | 1.63 | -13.02                | -21.07 | 21.29 | 26.63  | 34.42    | 24.67 | 19.59      | 10.21  | 0.78 | 0.23   |
| Cerebellum    | 20.19     | 6.60 | 17.04 <sup>§</sup> | 4.23 | 21.49       | 2.99 | 17.75 <sup>§</sup> | 2.05 | -12.31                | -16.32 | 17.69 | 21.75  | 32.70    | 24.83 | 13.92      | 11.57  | 0.78 | 0.08   |
| Mesencephalon | 23.67     | 7.85 | 19.31 <sup>§</sup> | 4.37 | 23.18       | 4.10 | 18.49 <sup>§</sup> | 2.16 | -14.94                | -18.44 | 20.47 | 24.30  | 33.14    | 22.64 | 17.68      | 11.66  | 0.73 | 0.29   |
| Pons          | 23.53     | 6.63 | 19.27 <sup>§</sup> | 3.69 | 22.76       | 3.54 | 18.30 <sup>§</sup> | 1.80 | -15.70                | -18.33 | 18.29 | 22.21  | 28.16    | 19.13 | 15.57      | 9.85   | 0.72 | 0.23   |
| Striatum      | 23.11     | 7.89 | 19.20 <sup>§</sup> | 4.63 | 22.15       | 4.65 | 17.11 <sup>§</sup> | 1.75 | -12.56                | -19.92 | 22.38 | 26.99  | 34.13    | 24.13 | 21.00      | 10.25  | 0.78 | 0.18   |
| Cortex        | 19.68     | 7.12 | 16.36 <sup>§</sup> | 4.40 | 19.49       | 4.50 | 14.35 <sup>§</sup> | 1.56 | -12.20                | -23.69 | 22.75 | 29.70  | 36.18    | 26.86 | 23.08      | 10.88  | 0.79 | 0.25   |
| Hippocampus   | 22.02     | 8.41 | 17.72 <sup>§</sup> | 4.89 | 21.53       | 4.60 | 16.29 <sup>§</sup> | 1.73 | -14.86                | -21.91 | 23.38 | 27.44  | 38.20    | 27.60 | 21.35      | 10.62  | 0.78 | 0.24   |
| Hypothalamus  | 19.83     | 6.07 | 16.52 <sup>§</sup> | 3.00 | 19.82       | 3.74 | 16.11 <sup>§</sup> | 2.08 | -12.69                | -16.25 | 20.97 | 24.72  | 30.59    | 18.19 | 18.89      | 12.91  | 0.71 | 0.39   |
| Thalamus      | 24.25     | 8.27 | 20.30 <sup>§</sup> | 4.74 | 23.88       | 4.69 | 18.39 <sup>§</sup> | 1.78 | -12.18                | -20.62 | 20.34 | 27.25  | 34.09    | 23.33 | 19.62      | 9.66   | 0.78 | 0.21   |

Values for rCMR<sub>glucose</sub> in male and female rats at test and retest are reported as  $\mu\text{mol}/\text{min}/100 \text{ g tissue}$  (mean  $\pm$  standard deviation). Significant differences are indicated in the following way: <sup>§</sup> between retest and test. Significant differences between the sexes were not detected.

## Supplementary Table 2: Glucose influx

| Region        | MALE Test |       | MALE Retest        |       | FEMALE Test |       | FEMALE Retest       |       | % relative difference |        | TRV   | TRV    | COV Test | COV Retest | COV Test | COV Retest | ICC  | ICC    |
|---------------|-----------|-------|--------------------|-------|-------------|-------|---------------------|-------|-----------------------|--------|-------|--------|----------|------------|----------|------------|------|--------|
|               | Mean      | SD    | Mean               | SD    | Mean        | SD    | Mean                | SD    | MALE                  | FEMALE | MALE  | FEMALE | MALE     | MALE       | FEMALE   | FEMALE     | MALE | FEMALE |
| Entire brain  | 0.012     | 0.004 | 0.011              | 0.003 | 0.018*      | 0.003 | 0.014* <sup>§</sup> | 0.003 | -5.43                 | -19.35 | 6.11  | 23.60  | 29.48    | 25.09      | 19.59    | 17.99      | 0.93 | 0.40   |
| Cerebellum    | 0.012     | 0.003 | 0.011              | 0.003 | 0.018*      | 0.003 | 0.016* <sup>§</sup> | 0.003 | -4.36                 | -14.45 | 7.63  | 18.41  | 28.68    | 23.29      | 17.66    | 21.65      | 0.93 | 0.62   |
| Mesencephalon | 0.014     | 0.004 | 0.013              | 0.003 | 0.020*      | 0.004 | 0.016* <sup>§</sup> | 0.003 | -7.20                 | -16.72 | 8.70  | 20.90  | 29.43    | 21.15      | 19.17    | 19.86      | 0.90 | 0.56   |
| Pons          | 0.014     | 0.003 | 0.013 <sup>§</sup> | 0.003 | 0.019*      | 0.003 | 0.016* <sup>§</sup> | 0.003 | -7.79                 | -16.49 | 8.88  | 20.36  | 25.06    | 19.84      | 16.92    | 16.92      | 0.93 | 0.51   |
| Striatum      | 0.013     | 0.004 | 0.013              | 0.003 | 0.019*      | 0.004 | 0.015 <sup>§</sup>  | 0.003 | -4.95                 | -18.39 | 11.12 | 23.75  | 28.26    | 25.05      | 20.69    | 18.15      | 0.93 | 0.37   |
| Cortex        | 0.012     | 0.004 | 0.011              | 0.003 | 0.017*      | 0.004 | 0.013 <sup>§</sup>  | 0.002 | -4.72                 | -22.01 | 11.52 | 26.54  | 30.98    | 27.83      | 21.89    | 17.04      | 0.93 | 0.33   |
| Hippocampus   | 0.013     | 0.004 | 0.012              | 0.003 | 0.018*      | 0.004 | 0.014* <sup>§</sup> | 0.003 | -7.58                 | -20.18 | 12.04 | 24.72  | 32.99    | 27.38      | 21.02    | 17.63      | 0.92 | 0.39   |
| Hypothalamus  | 0.012     | 0.003 | 0.011              | 0.002 | 0.017*      | 0.003 | 0.014* <sup>§</sup> | 0.003 | -4.99                 | -14.75 | 9.08  | 19.08  | 24.92    | 18.03      | 18.66    | 18.65      | 0.91 | 0.51   |
| Thalamus      | 0.014     | 0.004 | 0.013              | 0.003 | 0.020*      | 0.004 | 0.016* <sup>§</sup> | 0.003 | -4.43                 | -18.89 | 10.31 | 23.89  | 29.52    | 24.89      | 20.13    | 19.09      | 0.94 | 0.42   |

Values for glucose influx in male and female rats at test and retest are reported as ml/ccm/min (mean  $\pm$  standard deviation). Significant differences are indicated in the following way: \* between females and males, and <sup>§</sup> between retest and test.

### Supplementary Table 3: [<sup>18</sup>F]FDG uptake (SUV)

| Region        | MALE Test |      | MALE Retest |      | FEMALE Test |      | FEMALE Retest     |      | % relative difference |        | TRV  | TRV    | COV Test | COV Retest | COV Test | COV Retest | ICC  | ICC    |
|---------------|-----------|------|-------------|------|-------------|------|-------------------|------|-----------------------|--------|------|--------|----------|------------|----------|------------|------|--------|
|               | Mean      | SD   | Mean        | SD   | Mean        | SD   | Mean              | SD   | MALE                  | FEMALE | MALE | FEMALE | MALE     | MALE       | FEMALE   | FEMALE     | MALE | FEMALE |
| Entire brain  | 2.47      | 0.58 | 2.45        | 0.73 | 3.27*       | 0.73 | 2.88 <sup>§</sup> | 0.48 | -1.24                 | -9.41  | 5.83 | 16.28  | 23.44    | 29.90      | 22.38    | 16.53      | 0.96 | 0.60   |
| Cerebellum    | 2.44      | 0.52 | 2.43        | 0.73 | 3.28*       | 0.60 | 3.01 <sup>§</sup> | 0.53 | -1.08                 | -7.13  | 9.10 | 13.89  | 21.37    | 30.10      | 18.26    | 17.78      | 0.92 | 0.72   |
| Mesencephalon | 2.72      | 0.62 | 2.64        | 0.74 | 3.43*       | 0.70 | 3.05 <sup>§</sup> | 0.52 | -2.78                 | -8.85  | 8.17 | 14.74  | 22.76    | 28.00      | 20.51    | 16.88      | 0.94 | 0.67   |
| Pons          | 2.64      | 0.57 | 2.57        | 0.69 | 3.32*       | 0.65 | 2.97 <sup>§</sup> | 0.48 | -2.78                 | -8.63  | 7.23 | 14.33  | 21.43    | 26.96      | 19.73    | 16.25      | 0.95 | 0.69   |
| Striatum      | 2.63      | 0.64 | 2.62        | 0.81 | 3.29        | 0.78 | 2.88 <sup>§</sup> | 0.47 | -1.05                 | -9.15  | 5.74 | 16.36  | 24.34    | 30.73      | 23.62    | 16.49      | 0.97 | 0.55   |
| Cortex        | 2.35      | 0.57 | 2.35        | 0.73 | 2.95*       | 0.72 | 2.53 <sup>§</sup> | 0.39 | -0.59                 | -10.77 | 4.95 | 16.65  | 24.49    | 31.07      | 24.29    | 15.30      | 0.97 | 0.54   |
| Hippocampus   | 2.58      | 0.67 | 2.55        | 0.79 | 3.23        | 0.76 | 2.80 <sup>§</sup> | 0.44 | -1.88                 | -10.13 | 5.07 | 16.11  | 25.96    | 30.87      | 23.46    | 15.78      | 0.98 | 0.57   |
| Hypothalamus  | 2.41      | 0.47 | 2.39        | 0.59 | 3.03*       | 0.65 | 2.71 <sup>§</sup> | 0.45 | -1.50                 | -8.10  | 5.31 | 16.03  | 19.44    | 24.60      | 21.32    | 16.77      | 0.96 | 0.63   |
| Thalamus      | 2.83      | 0.67 | 2.79        | 0.82 | 3.56*       | 0.79 | 3.11 <sup>§</sup> | 0.53 | -1.59                 | -9.91  | 5.85 | 16.56  | 23.65    | 29.38      | 22.26    | 16.90      | 0.96 | 0.60   |

[<sup>18</sup>F]FDG uptake in male and female rats at test and retest is reported as SUV (mean ± standard deviation) and is therefore dimension-less. Significant differences are indicated in the following way: \* between females and males, and <sup>§</sup> between retest and test.

### Supplementary Table 4: [<sup>18</sup>F]FDG uptake (normalized SUV)

| Region        | MALE Test |      | MALE Retest       |      | FEMALE Test |      | FEMALE Retest      |      | % relative difference |        | TRV   | TRV    | COV Test | COV Retest | COV Test | COV Retest | ICC  | ICC    |
|---------------|-----------|------|-------------------|------|-------------|------|--------------------|------|-----------------------|--------|-------|--------|----------|------------|----------|------------|------|--------|
|               | Mean      | SD   | Mean              | SD   | Mean        | SD   | Mean               | SD   | MALE                  | FEMALE | MALE  | FEMALE | MALE     | MALE       | FEMALE   | FEMALE     | MALE | FEMALE |
| Entire brain  | 2.59      | 0.76 | 2.31 <sup>§</sup> | 0.75 | 3.31        | 0.83 | 2.83 <sup>§</sup>  | 0.50 | -9.90                 | -11.22 | 13.51 | 17.99  | 29.47    | 32.33      | 25.06    | 17.50      | 0.92 | 0.61   |
| Cerebellum    | 2.56      | 0.69 | 2.30              | 0.77 | 3.31*       | 0.65 | 2.95* <sup>§</sup> | 0.52 | -9.95                 | -8.94  | 15.78 | 15.43  | 27.08    | 33.29      | 19.66    | 17.59      | 0.90 | 0.68   |
| Mesencephalon | 2.84      | 0.77 | 2.50 <sup>§</sup> | 0.77 | 3.46        | 0.79 | 3.01 <sup>§</sup>  | 0.54 | -11.51                | -10.66 | 15.88 | 16.81  | 27.26    | 30.76      | 22.83    | 17.91      | 0.89 | 0.66   |
| Pons          | 2.75      | 0.71 | 2.42 <sup>§</sup> | 0.71 | 3.35        | 0.74 | 2.92 <sup>§</sup>  | 0.54 | -11.51                | -10.53 | 15.10 | 16.10  | 25.67    | 29.40      | 22.25    | 18.38      | 0.89 | 0.70   |
| Striatum      | 2.77      | 0.85 | 2.47 <sup>§</sup> | 0.81 | 3.33        | 0.88 | 2.84 <sup>§</sup>  | 0.51 | -9.72                 | -10.78 | 13.56 | 18.63  | 30.59    | 32.91      | 26.58    | 17.99      | 0.92 | 0.55   |
| Cortex        | 2.47      | 0.76 | 2.21              | 0.74 | 2.99        | 0.84 | 2.50 <sup>§</sup>  | 0.47 | -9.21                 | -12.47 | 14.04 | 18.65  | 30.80    | 33.23      | 27.90    | 18.67      | 0.92 | 0.57   |
| Hippocampus   | 2.72      | 0.88 | 2.40 <sup>§</sup> | 0.80 | 3.27        | 0.87 | 2.76 <sup>§</sup>  | 0.51 | -10.40                | -11.86 | 14.37 | 18.17  | 32.26    | 33.31      | 26.68    | 18.37      | 0.92 | 0.59   |
| Hypothalamus  | 2.53      | 0.66 | 2.26 <sup>§</sup> | 0.63 | 3.08        | 0.77 | 2.68 <sup>§</sup>  | 0.53 | -10.20                | -9.77  | 13.61 | 17.95  | 26.14    | 27.89      | 25.00    | 19.89      | 0.90 | 0.68   |
| Thalamus      | 2.96      | 0.86 | 2.63 <sup>§</sup> | 0.83 | 3.60        | 0.89 | 3.07 <sup>§</sup>  | 0.54 | -10.26                | -11.70 | 13.51 | 18.33  | 29.01    | 31.46      | 24.82    | 17.72      | 0.91 | 0.60   |

[<sup>18</sup>F]FDG uptake in male and female rats at test and retest is reported as normalized SUV (mean ± standard deviation) and is therefore dimension-less. Significant differences are indicated in the following way: \* between females and males, and <sup>§</sup> between retest and test.
